# Supplementary material for: Extracellular Cystatin F Is Internalised by Cytotoxic T Lymphocytes and Decreases Their Cytotoxicity
Source: MDPI journal article supplement (doi:10.3390/cancers12123660), 2020-12-06
Supplement: s1 [file s1]

## Supplementary Materials

# Extracellular Cystatin F Is Internalised by Cytotoxic T Lymphocytes and Decreases Their Cytotoxicity

Mateja Prunk, Milica Perišić Nanut, Tanja Jakoš, Jerica Sabotič, Urban Švajger and Janko Kos

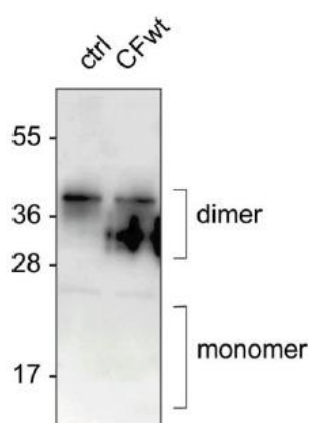

**Figure S1.** Extracellular full-length cystatin F is activated by N-terminal truncation after internalisation into TALL-104 cells. TALL-104 cells were either untreated (ctrl) or treated with 100 nM recombinant full-length cystatin F (CFwt) for 4 h. Activation after internalisation was assessed with cell lysates and western blot using an antibody directed against the N-terminal end of cystatin F. Since the antibody recognises the N-terminal part of cystatin F, it only detects the full-length form. The lack of monomeric band indicates that the internalised monomeric form of cystatin F (present on western blots performed with anti-cystatin F and anti-his-tag antibodies, Figure 1a,b) is N-terminally truncated.

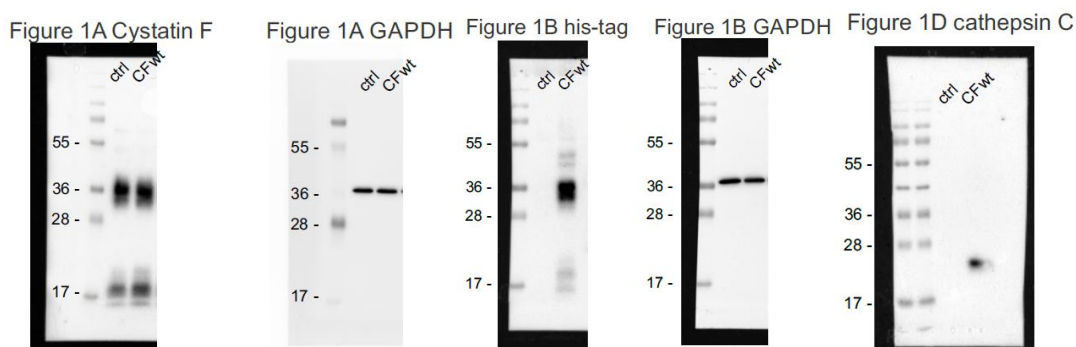

Detail information about Figure 1.

Figure 4A

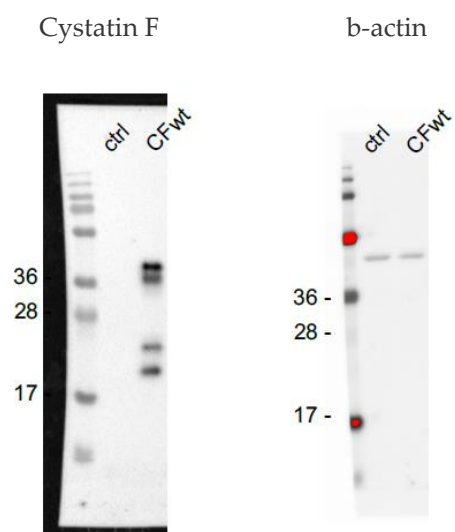

Figure 4B

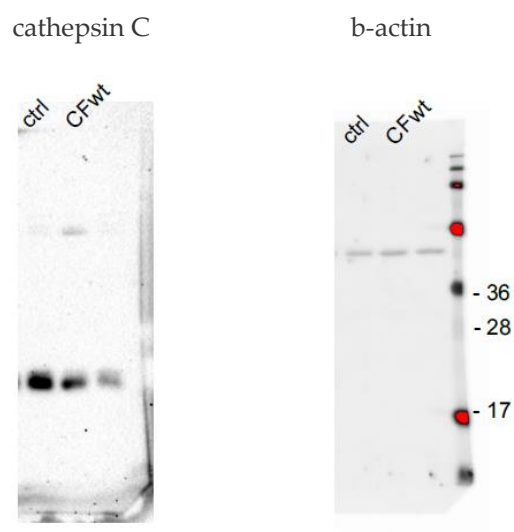

Figure 4D cathepsin C

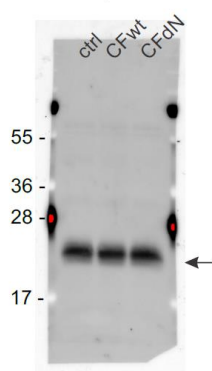

cathepsin H

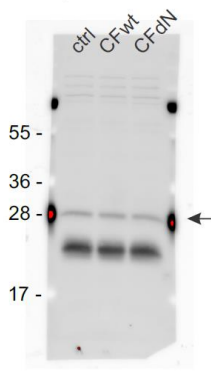

cathepsin L

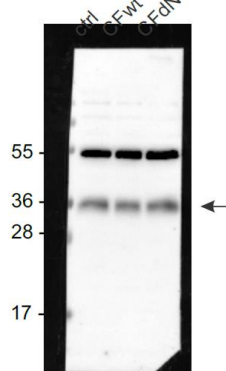

GAPDH

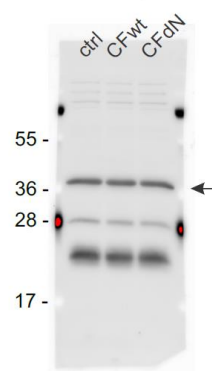

Figure 4E perforin

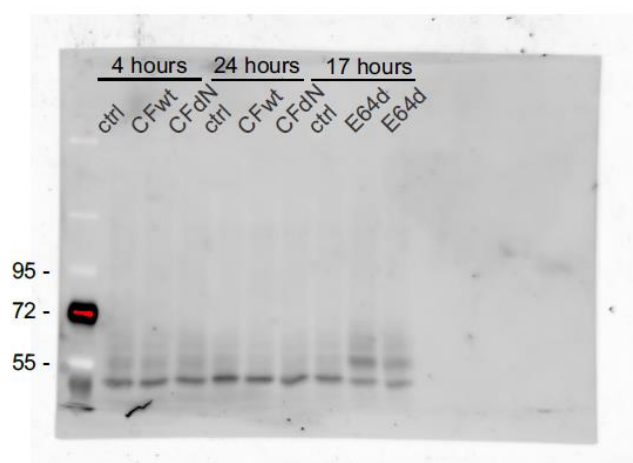

Detail information about Figure 4.

**Figure 5A** Cystatin F

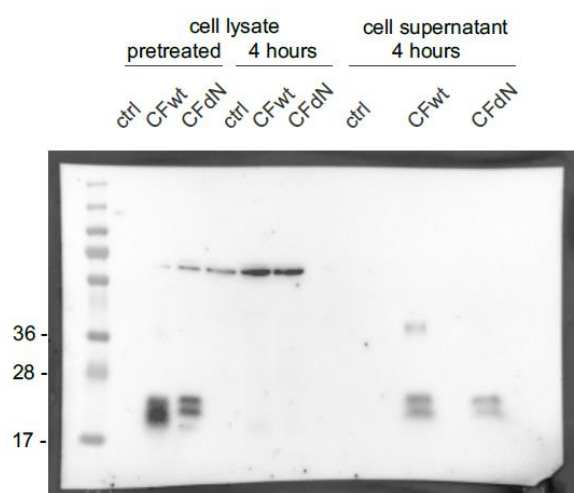

**Figure 5B** stain-free

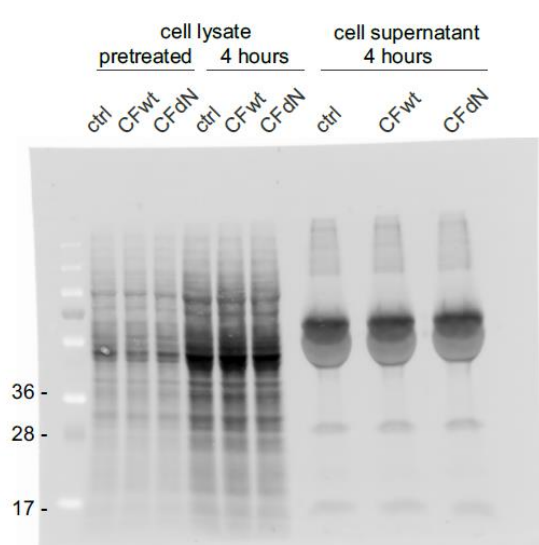

Detail information about Figure 5.

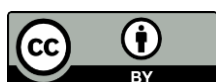

© 2020 by the authors. Licensee MDPI, Basel, Switzerland. This article is an open access article distributed under the terms and conditions of the Creative Commons Attribution (CC BY) license (<http://creativecommons.org/licenses/by/4.0/>).
